# Supplementary material for: LCST polymers with UCST behavior
Source: Royal Society of Chemistry journal article supplement (doi:10.1039/d0sm01505a), 2021-01-01
Supplement: d0sm01505a1.pdf [file d0sm01505a1.pdf]

## Supporting information:

### 1. Static and Dynamic Light Scattering (SLS and DLS)

Static light scattering (SLS) and dynamic light scattering (DLS) were conducted as a function of the detection angle  $\theta$ . In SLS measurements, the scattering intensities for sample ( $I_s$ ), toluene ( $I_{tol}$ ), and PBS as solvent ( $I_0$ ) were measured as a function of the scattering angle  $\theta$  (range from 30 to 130°). Furthermore, the dark current  $I_{dark}$  (detector intensity with laser switched off) was measured. The obtained intensities were converted into Rayleigh scattering ( $R$ ) to obtain absolute scattering of the sample according to equation 1:

$$(1) \quad R(\theta) = \left( \frac{I_s(\theta) - I_0(\theta)}{I_{tol}(\theta) - I_{dark}} \right) \frac{n_s^2}{n_{tol}^2} R_{tol}$$

In which  $n_{tol} = 1.494$  and  $n_s = 1.332$  are the refractive index of the reference and solvent, respectively, and  $R_{tol}$  is the known absolute Rayleigh scattering for toluene at 632.8 nm wavelength. For  $R_{tol}$ , we used  $1.02 \cdot 10^{-3} \text{ m}^{-1}$ .<sup>1</sup> Then, the scattering angle  $\theta$  was converted into the wave vector  $q$  based on equation 2:

$$(2) \quad q = \frac{4\pi n_s \sin \frac{\theta}{2}}{\lambda}$$

where  $\lambda$  is the wavelength in vacuum.

- Therefore,  $R_g$  was obtained according to Guinier<sup>2</sup> by plotting  $\ln(R)$  as a function of  $q^2$  in which the slope is equal to:  $\frac{R_g^2}{3}$  (results are shown in table 1)
- Hydrodynamic radius ( $R_h$ ) was obtained by DLS. The decay rate,  $\Gamma$ , extracted from the second order cumulant was plotted as a function of  $q^2$ . For monodisperse particles this should result in a straight line with a slope equals to the diffusion coefficient  $D$  and from that  $R_h$  was obtained using the Stokes Einstein equation 3: (results are shown in table 1)

$$(3) \quad D = \frac{kT}{6\pi\eta R_h}$$

- To obtain  $M_w$ , the absolute scattering intensity  $R$  was plotted as a function of  $q$  and extrapolated to  $q = 0$ . The absolute scattering  $R$  should equal to: (results are shown in table 1)

$$(4) \quad R = K_r C M_w S(q) P(qR)$$

At low concentration, the structure factor  $S(q) \approx 1$  and at  $q \rightarrow 0$  the form factor was considered  $P(qR) = 1$ , therefore,  $R(q \rightarrow 0) = K_r C M_w$  where  $K_r$  an optical constant (equation 5) and  $C$  the particle concentration in  $\text{kg} \cdot \text{m}^{-3}$ .

$$(5) \quad K_r = \frac{4n_s^2 \pi^2}{\lambda^4 N_{Av}} \left( \frac{dn}{dc} \right)^2$$

**Table 1:** Characteristics of core crosslinked flower-like micelles measured at 10 and 40 °C; For comparison, micelle characteristics at other temperatures have been reported before for a slightly different polymer batch.<sup>3</sup>

| T (°C) | R <sub>g</sub> (nm) <sup>a</sup> | R <sub>h</sub> (nm) <sup>b</sup> | R <sub>g</sub> /R <sub>h</sub> | M <sub>w</sub> (mic.)<br>(10 <sup>6</sup> Da) | N <sub>agg</sub> <sup>d</sup> |
|--------|----------------------------------|----------------------------------|--------------------------------|-----------------------------------------------|-------------------------------|
| 10     | 46.0±0.8                         | 48.2±0.9                         | 0.95±0.00                      | 16.3±0.4                                      | 430±10                        |
| 40     | 30±0.8                           | 35.4±0.4                         | 0.85±0.01                      | 14.8±0.2                                      | 381±10                        |

## 2. Calculation of Effective Volume Fraction ( $\varphi$ )

$$V_t = \text{Micelles (mg)} \times 0.83 \text{ cm} \cdot \text{g}^{-1} (\text{partial specific volume of PNIPAM})^1 + \text{PBS (mL)}$$

$$\text{Number of micelles} = \frac{\text{Micelles (gr)}}{N_A \times M_w \text{ micelle}}, \text{ where } N_A \text{ is Avogadro constant and } M_w \text{ micelle molecular weight (15.55} \times 10^6 \text{ kDa as the average molecular weight of micelles at 10 and 40 } ^\circ\text{C was considered)}$$

$$V_m = \text{number of micelles} \times \text{volume of micelles at the corresponding temperature}$$

**Table 2:** The summary of results for calculation of  $\varphi$ .  $T_c$  is 28 °C.

| Sample conc. (wt%) | Micelles (mg) | PBS (mL) | Sample volume ( $V_t$ ) (mL) | Number of micelles ( $\times 10^{15}$ ) | Volume of micelles ( $V_m$ )(mL) |             | $\varphi$ or ( $\frac{V_t}{V_m}$ ) |             |
|--------------------|---------------|----------|------------------------------|-----------------------------------------|----------------------------------|-------------|------------------------------------|-------------|
|                    |               |          |                              |                                         | Below $T_c$                      | Above $T_c$ | Below $T_c$                        | Above $T_c$ |
| 7.5                | 75            | 0.925    | 0.987                        | 2.89                                    | 1.34                             | 0.52        | 1.36                               | 0.53        |
| 10                 | 100           | 0.900    | 0.983                        | 3.86                                    | 1.79                             | 0.69        | 1.82                               | 0.7         |
| 12.5               | 125           | 0.875    | 0.979                        | 4.82                                    | 2.23                             | 0.87        | 2.28                               | 0.88        |
| 15                 | 150           | 0.850    | 0.975                        | 5.79                                    | 2.68                             | 1.04        | 2.75                               | 1.07        |
| 20                 | 200           | 0.800    | 0.966                        | 7.72                                    | 3.57                             | 1.39        | 3.7                                | 1.43        |
| 30                 | 300           | 0.700    | 0.949                        | 11.6                                    | 5.36                             | 2.08        | 5.65                               | 2.19        |

1. Wu, H., Correlations between the Rayleigh ratio and the wavelength for toluene and benzene. *Chemical Physics* **2010**, *367* (1), 44-47.
2. Guinier, A.; Fournet, G., *Small-Angle Scattering of X-Rays*. John Wiley and Sons, Inc., New York, 1955.
3. Najafi, M.; Kordalivand, N.; Moradi, M. A.; van den Dikkenberg, J.; Fokkink, R.; Friedrich, H.; Sommerdijk, N.; Hembury, M.; Vermonden, T., Native Chemical Ligation for Cross-Linking of Flower-Like Micelles. *Biomacromolecules* **2018**, *19* (9), 3766-3775.
4. Sommer, C.; Pedersen, J. S.; Stein, P. C., Apparent Specific Volume Measurements of Poly(ethylene oxide), Poly(butylene oxide), Poly(propylene oxide), and Octadecyl Chains in the Micellar State as a Function of Temperature. *The Journal of Physical Chemistry B* **2004**, *108* (20), 6242-6249.
